# Supplementary material
Source: PubMed Central journal article supplement (PMC5662132)
Supplement: NIHMS889790-supplement-Supplement1.pdf [file NIHMS889790-supplement-Supplement1.pdf]

## Supplementary Appendix

This appendix has been provided by the authors to give readers additional information about their work.

Supplement to: Kraft WK, Adeniyi-Jones SC, Chervoneva I, et al. Buprenorphine for the treatment of the neonatal abstinence syndrome. *N Engl J Med* 2017;376:2341-8. DOI: 10.1056/NEJMoa1614835

## Supplement to “Buprenorphine for the treatment of the neonatal abstinence syndrome”

### Contents:

|                                                                                                            | Page |
|------------------------------------------------------------------------------------------------------------|------|
| Figure S1: Dose protocol                                                                                   | 2    |
| Table S1: MOTHER NAS Scale                                                                                 | 3    |
| Table S2: Description of study drug formulation and dosage                                                 | 4    |
| Table S3: Descriptive statistics for length of treatment days                                              | 5    |
| Table S4: Descriptive statistics for length of stay days                                                   | 5    |
| Table S5: Estimated coefficients for the post-natal trends in respiratory rates while receiving study drug | 6    |
| Table S6: Estimated coefficients for the weight change trends while receiving study drug                   | 7    |
| Table S7: Post-natal mean change from the birth weight                                                     | 8    |
| Table S8: Estimated coefficients for post-natal heart rates trends while receiving study drug              | 9    |
| Table S9: Mean post-natal heart rates while receiving study drug                                           | 10   |
| Table S10: Thomas Jefferson University Hospital Morphine NAS Regimen                                       | 11   |
| DSMB Membership                                                                                            | 11   |

Figure S1. Dose protocol

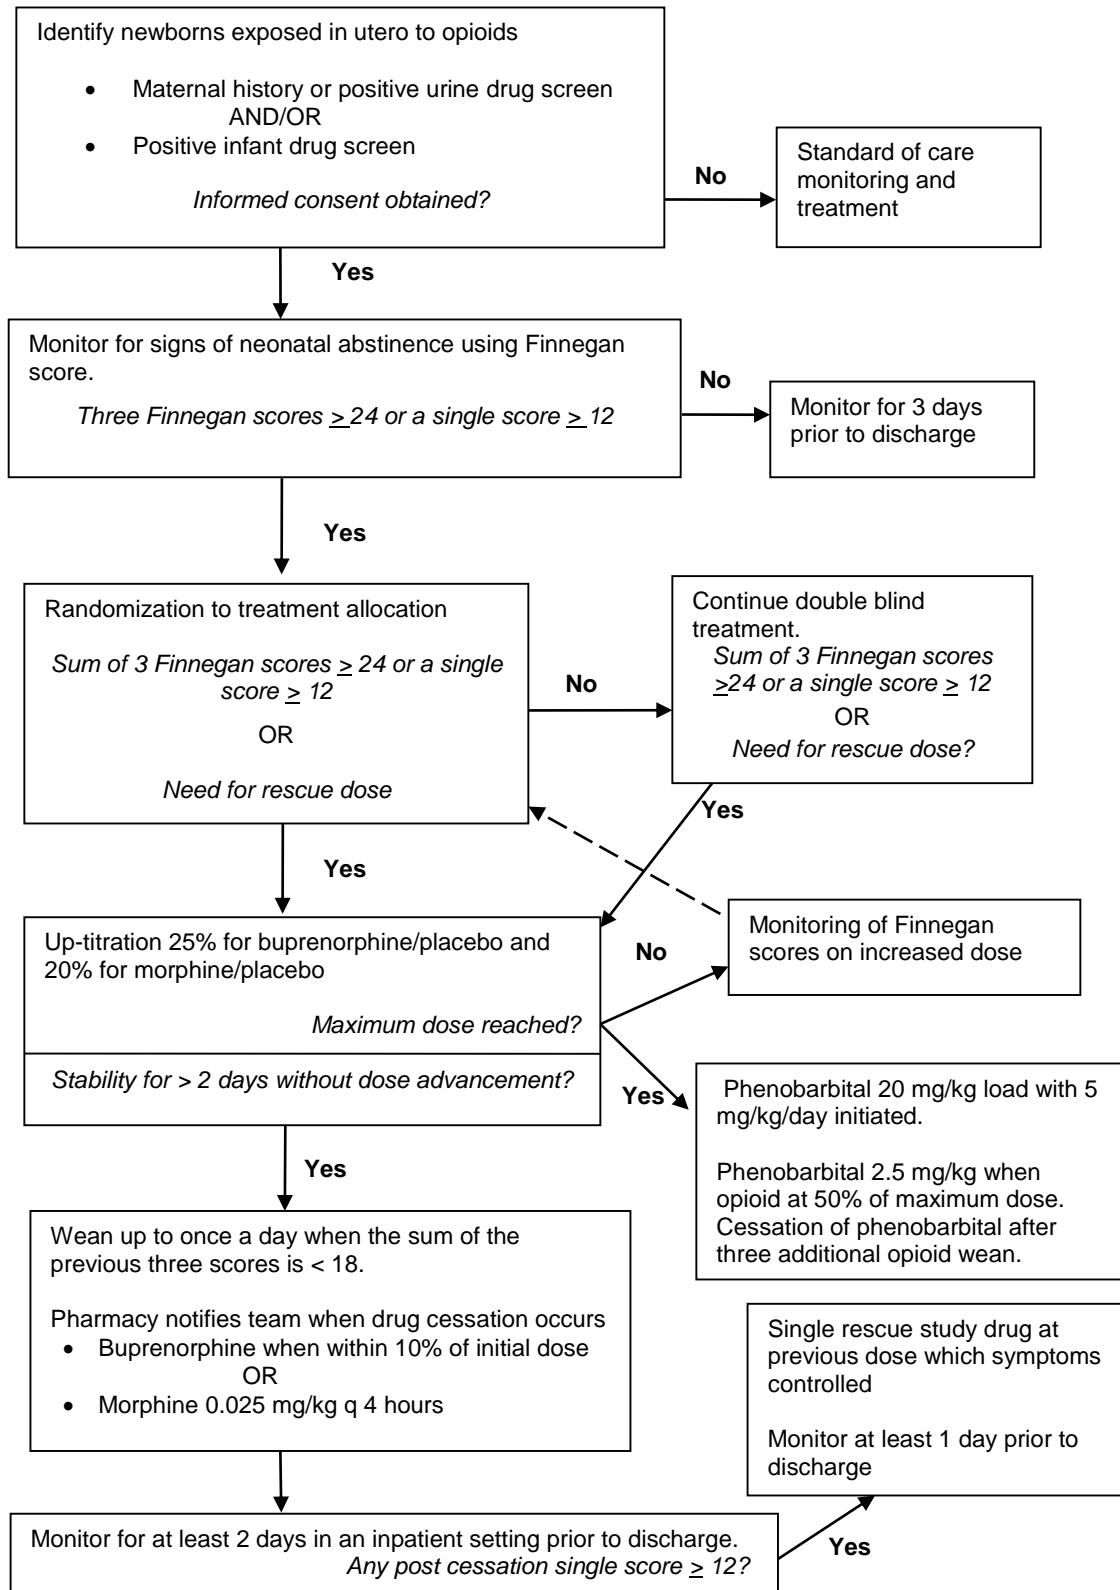

Table S1: MOTHER NAS Scale

| <b>Scored Elements</b>                                                                                        |              |
|---------------------------------------------------------------------------------------------------------------|--------------|
| <i>Signs and Symptoms</i>                                                                                     | <i>Score</i> |
| Crying: Excessive high pitched                                                                                | 2            |
| Crying: Continuous high pitched                                                                               | 3            |
| Sleeps < 1 hours after feeding                                                                                | 3            |
| Sleeps < 2 hours after feeding                                                                                | 2            |
| Sleeps < 3 hours after feeding                                                                                | 1            |
| Hyperactive Moro Reflex                                                                                       | 1            |
| Markedly Hyperactive Moro Reflex                                                                              | 2            |
| Mild Tremors: Disturbed                                                                                       | 1            |
| Moderate-Severe Tremors: Disturbed                                                                            | 2            |
| Mild tremors: Undisturbed                                                                                     | 1            |
| Moderate-Severe Tremors: Undisturbed                                                                          | 2            |
| Increased Muscle Tone                                                                                         | 1-2          |
| Excoriation (Indicate specific area):                                                                         | 1-2          |
| Generalized Seizure (or convulsion)                                                                           | 8            |
| Fever > 37.3 C (99.2 F)                                                                                       | 1            |
| Frequent Yawning (4 or more successive times)                                                                 | 1            |
| Sweating                                                                                                      | 1            |
| Nasal Stuffiness                                                                                              | 1            |
| Sneezing (4 or more successive times)                                                                         | 1            |
| Tachypnea (Respiratory Rate >60/mm)                                                                           | 2            |
| Poor feeding                                                                                                  | 2            |
| Vomiting (or regurgitation)                                                                                   | 2            |
| Loose Stools                                                                                                  | 2            |
| Failure to thrive (Current weight > 10% below birth weight 90% BWT=_____ (record weight in score box 1 x day) | 2            |
| Excessive Irritability                                                                                        | 1-3          |
| <b>Total Score</b>                                                                                            |              |

Table S2: Description of study drug formulation and dosage

|                            | <b>Buprenorphine</b>                                        | <b>Morphine</b>                     |
|----------------------------|-------------------------------------------------------------|-------------------------------------|
| Active drug solution       | 0.075 mg/ml buprenorphine in 30% ethanol, with simple syrup | 0.4 mg/ml morphine in sterile water |
| Placebo solution           | Sterile water and simple syrup                              | FD&C Blue #3 in sterile water       |
| Initial daily dose         | 15.9 mcg/kg/day                                             | 0.4 mg/kg/day                       |
| Initial unit dose          | 5.3 mcg/kg q8 hours                                         | 0.07 mg/kg q 4 hours                |
| Maximum daily dose         | 60 mcg/kg/day                                               | 1.2 mg/kg/day                       |
| Maximum unit dose          | 20 mcg/kg q8 hours                                          | 0.2 mg/kg q 4 hours                 |
| Up-titration rate          | 25%                                                         | 20%                                 |
| Maximum # of up-titrations | 6                                                           | 6                                   |
| Weaning rate               | 10%                                                         | 10%                                 |
| Cessation Dose             | Within 10% of starting dose                                 | 0.025 mg/kg q 4 hours               |

Table S3: Descriptive statistics for length of treatment days

| <b>Treatment</b>                  | <b>Strata</b> | <b>Min</b> | <b>Q1</b> | <b>Median</b> | <b>Mean</b> | <b>Q3</b> | <b>Max</b> |
|-----------------------------------|---------------|------------|-----------|---------------|-------------|-----------|------------|
| <i>Intent to treat population</i> |               |            |           |               |             |           |            |
| Buprenorphine                     | bottle        | 3          | 7         | 15            | 18.57       | 22        | 67         |
| Buprenorphine                     | breast        | 3          | 12        | 20            | 20.92       | 25        | 55         |
| Morphine                          | bottle        | 13         | 21        | 28            | 32.1        | 40        | 67         |
| Morphine                          | breast        | 16         | 23        | 28            | 34.22       | 49        | 52         |
| <i>Per protocol population</i>    |               |            |           |               |             |           |            |
| Buprenorphine                     | bottle        | 3          | 4.75      | 14.5          | 14.39       | 18.75     | 32         |
| Buprenorphine                     | breast        | 3          | 12        | 20            | 20.92       | 25        | 55         |
| Morphine                          | bottle        | 13         | 20.75     | 28            | 30.75       | 37.75     | 67         |
| Morphine                          | breast        | 16         | 22        | 26            | 32.75       | 49.5      | 52         |
| <i>As treated population</i>      |               |            |           |               |             |           |            |
| Buprenorphine                     | bottle        | 3          | 4.75      | 14.5          | 14.39       | 18.75     | 32         |
| Buprenorphine                     | breast        | 3          | 12        | 20            | 20.92       | 25        | 55         |
| Morphine                          | bottle        | 13         | 20.75     | 30            | 33.54       | 41.25     | 67         |
| Morphine                          | breast        | 16         | 23        | 28            | 34.22       | 49        | 52         |

Table S4: Descriptive statistics for length of stay days

| <b>Treatment</b>                  | <b>Strata</b> | <b>Min</b> | <b>Q1</b> | <b>Median</b> | <b>Mean</b> | <b>Q3</b> | <b>Max</b> |
|-----------------------------------|---------------|------------|-----------|---------------|-------------|-----------|------------|
| <i>Intent to treat population</i> |               |            |           |               |             |           |            |
| Buprenorphine                     | bottle        | 7          | 17        | 21            | 23.9        | 27        | 71         |
| Buprenorphine                     | breast        | 7          | 15.5      | 26            | 27.08       | 37        | 58         |
| Morphine                          | bottle        | 18         | 28        | 33            | 38.52       | 46        | 70         |
| Morphine                          | breast        | 20         | 28        | 32            | 40.11       | 57        | 58         |
| <i>Per protocol population</i>    |               |            |           |               |             |           |            |
| Buprenorphine                     | bottle        | 7          | 12        | 20.5          | 20          | 24.75     | 37         |
| Buprenorphine                     | breast        | 7          | 15.5      | 26            | 27.08       | 37        | 58         |
| Morphine                          | bottle        | 18         | 27.75     | 33            | 37.25       | 43.75     | 70         |
| Morphine                          | breast        | 20         | 27.5      | 31            | 38.5        | 57        | 58         |
| <i>As treated population</i>      |               |            |           |               |             |           |            |
| Buprenorphine                     | bottle        | 7          | 12        | 20.5          | 20          | 24.75     | 37         |
| Buprenorphine                     | breast        | 7          | 15.5      | 26            | 27.08       | 37        | 58         |
| Morphine                          | bottle        | 17         | 27.75     | 34.5          | 39.62       | 49        | 71         |
| Morphine                          | breast        | 20         | 28        | 32            | 40.11       | 57        | 58         |

Table S5: Estimated coefficients for the post-natal trends in respiratory rates while receiving study drug

| <b>Coefficient</b> | <b>Drug</b>   | <b>Strata</b> | <b>Estimate</b> | <b>StdErr</b> | <b>95%LCL</b> | <b>95%UCL</b> | <b>P (*)</b> |
|--------------------|---------------|---------------|-----------------|---------------|---------------|---------------|--------------|
| Intercept          | Buprenorphine | bottle        | 54.3            | 2.06          | 50.0          | 58.5          | <.0001       |
| Intercept          | Buprenorphine | breast        | 56.3            | 2.35          | 51.5          | 61.2          | <.0001       |
| Intercept          | Morphine      | bottle        | 51.9            | 1.04          | 49.8          | 54.0          | <.0001       |
| Intercept          | Morphine      | breast        | 48.8            | 1.63          | 45.5          | 52.2          | <.0001       |
| Linear             | any           | bottle        | -0.114          | 0.031         | -0.179        | -0.048        | 0.002        |
| Linear             | any           | breast        | 0.015           | 0.048         | -0.087        | 0.118         | 0.76         |

(\*) p-value for testing the null hypothesis that corresponding coefficient is zero.

Variance component estimates with Wald tests, based on 14,332 observations in 58 subjects:

Random effect in intercept: 61.4, SE=18.5, p<0.001 (Buprenorphine); 18.9, SE=5.8, p<0.001 (Morphine)

Random effect in linear coef.: 0.20, SE=0.08, p=0.004 (Buprenorphine), 0.01, SE=0.006, p=0.045 (Morphine),

Residual: 140.8, SE=1.7, p<0.0001.

Table S6: Estimated coefficients for the weight change trends while receiving study drug

| <b>Coefficient</b> | <b>Drug</b>   | <b>Strata</b> | <b>Estimate</b> | <b>StdErr</b> | <b>95%LCL</b> | <b>95%UCL</b> | <b>P (*)</b> |
|--------------------|---------------|---------------|-----------------|---------------|---------------|---------------|--------------|
| Intercept          | Buprenorphine | 0             | -36.2           | 33.8          | -103.2        | 30.7          | 0.29         |
| Intercept          | Buprenorphine | 1             | -292.9          | 27.9          | -349.2        | -236.5        | <.0001       |
| Intercept          | Morphine      | 0             | -180.3          | 22.4          | -225.5        | -135.1        | <.0001       |
| Intercept          | Morphine      | 1             | -201.5          | 36.4          | -274.7        | -128.4        | <.0001       |
| Linear             | Buprenorphine | 0             | -95.5           | 11.9          | -118.8        | -72.2         | <.0001       |
| Linear             | Buprenorphine | 1             | -6.5            | 5.6           | -17.6         | 4.7           | 0.25         |
| Linear             | Morphine      | 0             | -13.0           | 3.4           | -19.8         | -6.2          | 0.000        |
| Linear             | Morphine      | 1             | -25.4           | 6.2           | -37.8         | -13.1         | <.0001       |
| Quadratic          | Buprenorphine | 0             | 11.27           | 1.48          | 8.36          | 14.17         | <.0001       |
| Quadratic          | Buprenorphine | 1             | 3.59            | 0.39          | 2.82          | 4.35          | <.0001       |
| Quadratic          | Morphine      | 0             | 3.11            | 0.21          | 2.71          | 3.52          | <.0001       |
| Quadratic          | Morphine      | 1             | 4.73            | 0.42          | 3.90          | 5.56          | <.0001       |
| Cubic              | Buprenorphine | 0             | -0.37           | 0.07          | -0.51         | -0.23         | <.0001       |
| Cubic              | Buprenorphine | 1             | -0.10           | 0.01          | -0.12         | -0.07         | <.0001       |
| Cubic              | Morphine      | 0             | -0.07           | 0.01          | -0.08         | -0.06         | <.0001       |
| Cubic              | Morphine      | 1             | -0.14           | 0.01          | -0.16         | -0.11         | <.0001       |
| Quartic            | Buprenorphine | 0             | 0.0043          | 0.0012        | 0.0020        | 0.0066        | 0.000        |
| Quartic            | Buprenorphine | 1             | 0.0008          | 0.0001        | 0.0006        | 0.0010        | <.0001       |
| Quartic            | Morphine      | 0             | 0.0005          | 0.0000        | 0.0004        | 0.0006        | <.0001       |
| Quartic            | Morphine      | 1             | 0.0012          | 0.0001        | 0.0010        | 0.0015        | <.0001       |

(\*) p-value for testing the null hypothesis that corresponding coefficient is zero.

Variance component estimates with Wald tests, based on 1077 observations in 58 subjects:

Random effect in intercept: 5943, SE=2039, p=0.002 (Buprenorphine); 6481, SE=2068, p<0.001 (Morphine)

Random effect in linear coef.: 106.5, SE=50.3, p=0.017 (Buprenorphine), 70.5, SE=27.7, p=0.005 (Morphine),

Residual: 1663, SE=83, p<0.0001.



Table S7: Post-natal mean change from the birth weight (g)

The mean weight change was significantly different between treatment groups only at week 1 (7 days post-natal) but not at 2-4 post-natal weeks.

| <b>Day</b> | <b>Drug</b>      | <b>Mean</b> | <b>95%LCL</b> | <b>95%UCL</b> | <b>p-value</b> |
|------------|------------------|-------------|---------------|---------------|----------------|
| 7          | Buprenorphine    | -231.2      | -275.9        | -186.5        | <.0001         |
| 14         | Buprenorphine    | 36.7        | -43.5         | 117.0         | 0.34           |
| 21         | Buprenorphine    | 380.0       | 245.1         | 514.9         | <.0001         |
| 28         | Buprenorphine    | 685.9       | 471.2         | 900.6         | <.0001         |
| 7          | Morphine         | -166.6      | -209.9        | -123.3        | <.0001         |
| 14         | Morphine         | 59.1        | -4.9          | 123.1         | 0.07           |
| 21         | Morphine         | 349.6       | 256.5         | 442.8         | <.0001         |
| 28         | Morphine         | 618.7       | 488.6         | 748.9         | <.0001         |
| 7          | Morphine vs. BUP | 64.5        | 3.7           | 125.4         | 0.04           |
| 14         | Morphine vs. BUP | 22.4        | -76.8         | 121.5         | 0.65           |
| 21         | Morphine vs. BUP | -30.4       | -187.7        | 127.0         | 0.69           |
| 28         | Morphine vs. BUP | -67.2       | -307.4        | 173.1         | 0.56           |

BUP = buprenorphine

Table S8: Estimated coefficients for post-natal heart rates trends while receiving study drug

| <b>Coefficient</b> | <b>Drug</b>   | <b>Strata</b> | <b>Estimate</b> | <b>StdErr</b> | <b>95%LCL</b> | <b>95%UCL</b> | <b>P (*)</b> |
|--------------------|---------------|---------------|-----------------|---------------|---------------|---------------|--------------|
| Intercept          | Buprenorphine | bottle        | 129.02          | 2.28          | 124.39        | 133.65        | <.0001       |
| Intercept          | Buprenorphine | breast        | 143.15          | 2.44          | 138.15        | 148.15        | <.0001       |
| Intercept          | Morphine      | bottle        | 136.49          | 1.49          | 133.45        | 139.52        | <.0001       |
| Intercept          | Morphine      | breast        | 135.52          | 2.35          | 130.74        | 140.30        | <.0001       |
| Linear             | Buprenorphine | bottle        | 2.14            | 0.24          | 1.66          | 2.61          | <.0001       |
| Linear             | Buprenorphine | breast        | 0.71            | 0.19          | 0.32          | 1.09          | 0.001        |
| Linear             | Morphine      | bottle        | 0.97            | 0.08          | 0.80          | 1.13          | <.0001       |
| Linear             | Morphine      | breast        | 0.80            | 0.13          | 0.54          | 1.05          | <.0001       |
| Quadratic          | Buprenorphine | bottle        | -0.047          | 0.008         | -0.062        | -0.032        | <.0001       |
| Quadratic          | Buprenorphine | breast        | -0.014          | 0.003         | -0.019        | -0.008        | <.0001       |
| Quadratic          | Morphine      | bottle        | -0.015          | 0.002         | -0.018        | -0.012        | <.0001       |
| Quadratic          | Morphine      | breast        | -0.013          | 0.002         | -0.018        | -0.008        | <.0001       |

(\*) p-value for testing the null hypothesis that corresponding coefficient is zero.

Variance component estimates with Wald tests, based on 14,409 observations in 58 subjects:

Random effect in intercept: 59.0, SE=19.15, p=0.001 (Buprenorphine); 34.3, SE=10.9, p<0.001 (Morphine)

Random effect in linear coef.: 0.21, SE=0.09, p=0.013 (Buprenorphine), 0.035, SE=0.017, p=0.020 (Morphine),

Residual: 270.6, SE=3.2, p<0.0001.

Table S9: Mean post-natal heart rates while receiving study drug

Though the quadratic functions had significantly different coefficients by drug and feeding stratum, the mean heart rates at 1-4 post-natal weeks were not significantly different between treatment groups.

| <b>Day</b> | <b>Drug</b>      | <b>Mean</b> | <b>95%LCL</b> | <b>95%UCL</b> | <b>p-value</b> |
|------------|------------------|-------------|---------------|---------------|----------------|
| 7          | Buprenorphine    | 145         | 141           | 148           | <.0001         |
| 14         | Buprenorphine    | 150         | 146           | 154           | <.0001         |
| 21         | Buprenorphine    | 153         | 147           | 158           | <.0001         |
| 28         | Buprenorphine    | 152         | 145           | 159           | <.0001         |
| 7          | Morphine         | 142         | 139           | 144           | <.0001         |
| 14         | Morphine         | 146         | 143           | 148           | <.0001         |
| 21         | Morphine         | 148         | 145           | 152           | <.0001         |
| 28         | Morphine         | 150         | 146           | 153           | <.0001         |
| 7          | Morphine vs. BUP | -3.0        | -7.3          | 1.2           | 0.16           |
| 14         | Morphine vs. BUP | -4.4        | -9.4          | 0.6           | 0.08           |
| 21         | Morphine vs. BUP | -4.1        | -10.3         | 2.1           | 0.19           |
| 28         | Morphine vs. BUP | -2.2        | -10.1         | 5.7           | 0.58           |

BUP = buprenorphine

## Table S10: Thomas Jefferson University Hospital Morphine Protocol

### **Initial dose:**

For three consecutive scores  $\geq 24$  or one score  $\geq 12$ , start morphine 0.4 mg/kg/day divided every 4 hours (0.07 mg/kg every 4 hours)

### **Dose Increase:**

20% increase per day for scores  $\geq 24$  total on three consecutive measurements or a single score  $\geq 12$

### **Rescue Dose**

If, between scheduled doses, a child has a single score of  $\geq 12$ , a rescue dose may be administered at the discretion of the treating physician.

### **Weaning Dose:**

- After 48 h of clinical stability, reduce morphine dose by 10% of the total initial dose every 24h
- Reduce dose when the sum of the previous three scores is  $< 18$  and no single score  $\geq 8$
- Cease therapy when dose is 0.15 mg/kg/day (0.025 mg/kg every 4 hours)
- If inadequate control of symptoms when weaning, administer rescue dose of morphine at current dose level.
- Observe at least 2 days after cessation of therapy.

### **Adjunctive treatment:**

If symptoms not controlled at maximum dose of morphine 1.2 mg/kg/day initiate phenobarbital 20 mg/kg load followed by 5 mg/kg/day.

### **Phenobarbital Weaning**

- When morphine has been weaned to at least 50% of the maximal dose and the sum of the previous three scores is  $< 18$  and no single score is  $\geq 8$ , decrease the phenobarbital dose to 2.5 mg/kg/day.
- The morphine dose will not be changed on the step when phenobarbital is weaned.
- Phenobarbital will be continued for three dose titrations. When the sum of the previous three scores is  $< 18$  and no single score is  $> 8$ , discontinue phenobarbital.
- Morphine dose will not be weaned on the step when phenobarbital is discontinued.

### **DSMB Membership**

*We thank the service of the following members who served for the entire duration of the trial*

Chair: Wade Berrettini

Committee Members: Laura McNicholas, Arzu Onar-Thomas, and John van Den Anker
